# Supplementary material for: Mango “Ataulfo” Peel Extract Improves Metabolic Dysregulation in Prediabetic Wistar Rats
Source: MDPI journal article supplement (doi:10.3390/life12040532), 2022-04-05
Supplement: s1 [file s1]

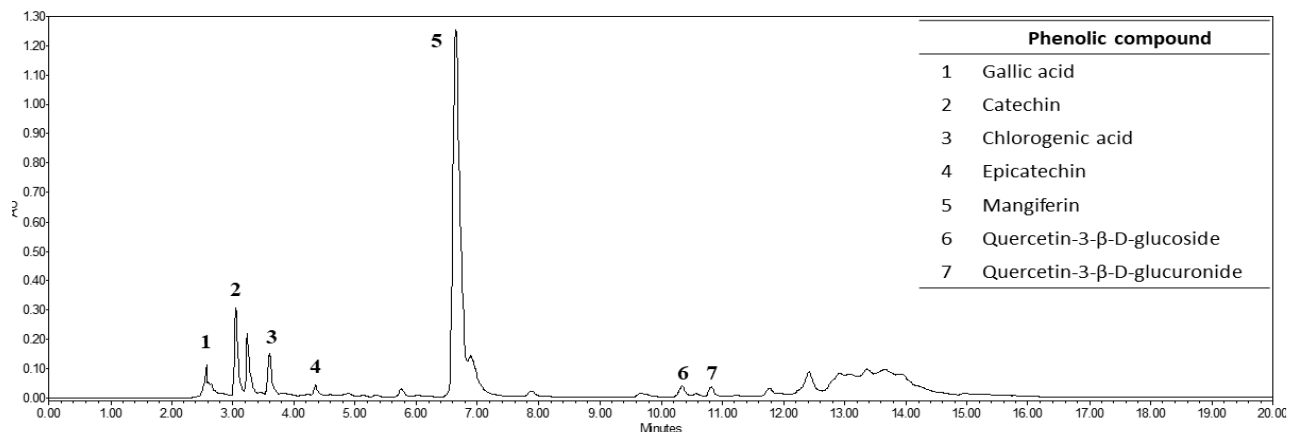

**Figure S1.** Representative UPLC-DAD chromatogram used to identify and quantify phenolic compounds present in mango peel ethanolic extract.

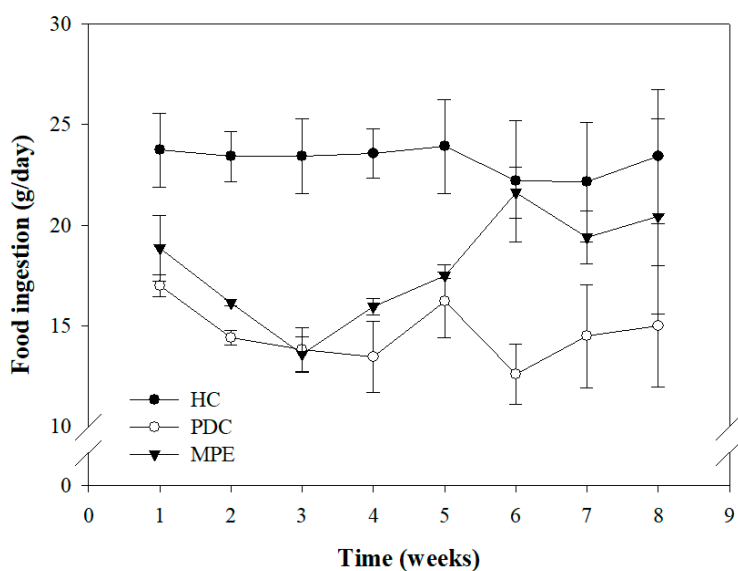

**Figure S2.** Time-trend changes in food ingestion of experimental groups. HC: healthy control; PDC prediabetes control group; MPE: mango peel ethanolic extract group.

**Table S1.** UPLC-DAD phenolic profile of mango peel extract (MPE).

| Phenolic compound           | Concentration ( $\mu\text{g}\cdot\text{g}^{-1}$ ) |
|-----------------------------|---------------------------------------------------|
| Gallic acid                 | $1.57 \pm 0.12$                                   |
| Catechin                    | $0.63 \pm 0.03$                                   |
| Chlorogenic acid            | $1.00 \pm 0.04$                                   |
| Epicatechin                 | $0.38 \pm 0.07$                                   |
| Mangiferin                  | $66.93 \pm 5.64$                                  |
| Quercetin-3-β-D-glucoside   | $1.17 \pm 0.06$                                   |
| Quercetin-3-β-D-glucuronide | $0.04 \pm 0.01$                                   |

Results are expressed as mean  $\pm$  standard deviation (n = 3).
